# Supplementary material
Source: publisher figshare collection journal article supplement (https://aacr.figshare.com/articles/dataset/_/22540705)
Supplement: Supplementary file 1 [file 40004056]

## Supplementary Fig. S4

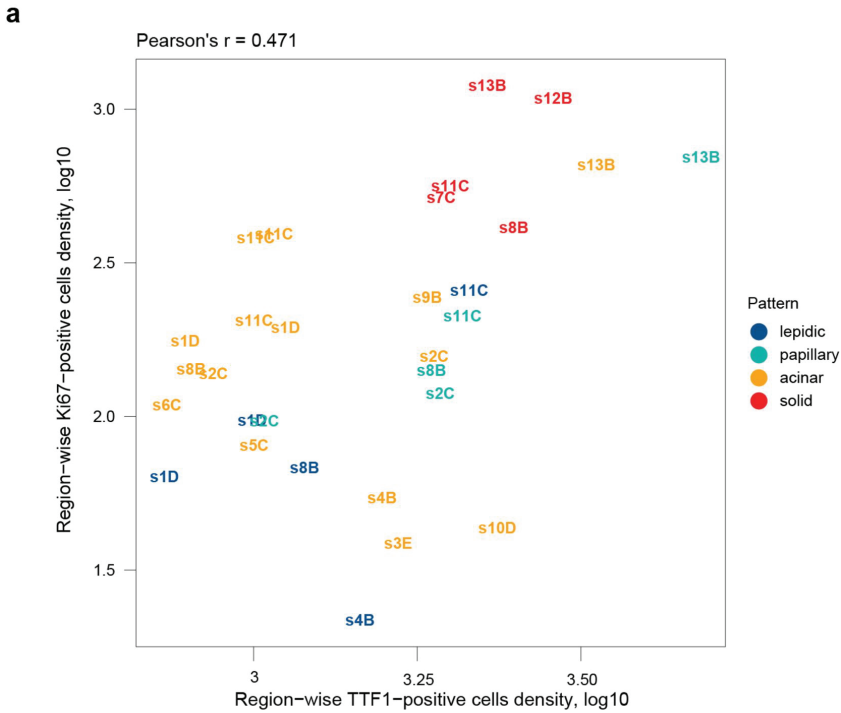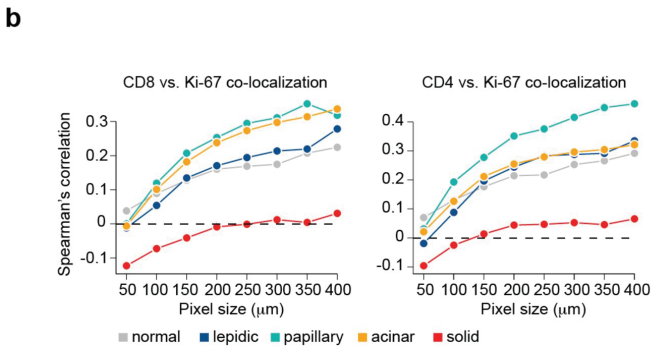

## Supplementary Fig. S4

**a)** Scatter plot of densities in log10 scale of TTF1-positive cells (X-axis) and Ki67-positive cells (Y-axis) for each region. Data points are labelled according to their slide of origin and color-coded by pattern.

**b)** Co-localization computed as Spearman's correlation coefficient between densities of Ki67-positive cells and CD8-positive cells (left) or CD4-positive cells (right) across different pixel sizes set in GridQuant and across patterns.
